# Supplementary material
Source: publisher figshare collection journal article supplement (https://acs.figshare.com/ndownloader/files/4096150)
Supplement: Supplementary file 1 [file 4096150]

## Supporting information for

# Identification of Potent and Selective Diphenylpropanamide ROR $\gamma$ Inhibitors

Jun R. Huh,<sup>‡</sup> Erika E. Englund,<sup>†</sup> Hang Wang,<sup>†</sup> Ruili Huang,<sup>†</sup> Pengxiang Huang,<sup>⊥</sup> Fraydoon Rastinejad,<sup>⊥</sup> James Inglese,<sup>†</sup> Christopher P. Austin,<sup>†</sup> Ronald L. Johnson,<sup>‡#</sup> Wenwei Huang,<sup>†\*</sup> Dan R. Littman<sup>‡##</sup>

<sup>†</sup>NIH Chemical Genomics Center, National Center for Advancing Translational Sciences, National Institutes of Health, 9800 Medical Center Drive, Bethesda, MD, 20892-3370.

<sup>‡</sup>Molecular Pathogenesis Program, The Kimmel Center for Biology and Medicine of the Skirball Institute, New York University School of Medicine, New York, NY 10016, USA

<sup>#</sup>Howard Hughes Medical Institute

<sup>⊥</sup>Sanford-Burnham Medical Research Institute at Lake Nona, 6400 Sanger Road, Orlando, FL 32827, USA

<sup>‡</sup>Present address: Division of Cancer Biology, National Cancer Institute

\*Corresponding Author: WH Tel: 301-217-5740. Email: [huangwe@mail.nih.gov](mailto:huangwe@mail.nih.gov).

Or DRL Tel: 212-263-5711. Email: [Dan.Littman@med.nyu.edu](mailto:Dan.Littman@med.nyu.edu).

## Materials and Methods

### Biology

The ROR $\gamma$  assay employed *Drosophila* Schneider cells that stably expressed two vectors: a vector encoding a fusion of the Gal4 DNA binding domain and ROR $\gamma$ t transactivation domain under the control of the metallothionine promoter, and a *Photinus* luciferase reporter regulated by the Gal4 binding site enhancer, UAS. Addition of 700  $\mu$ M copper to the medium induced expression of the Gal4-ROR $\gamma$ t fusion, which subsequently led to expression of the luciferase reporter. Small molecule inhibitors of ROR $\gamma$  activity were detected by a decrease in luciferase reporter activity.

To identify nonspecific and nonselective inhibitors, three other engineered *Drosophila* Schneider cell lines were used; these employed the same methodology, but differed only in the Gal4-transactivation domain fusion. The VP16 assay utilized a fusion of the Gal4 DNA binding domain to the transactivation domain of VP16, a herpes virus-encoded protein that functions as a general transcriptional activator. The VP16 assay was used as a counter screen for the ROR $\gamma$  reporter assay in both the primary and confirmatory screens to identify nonspecific inhibitors that suppress general transcription or luciferase activity. The other two assays, termed ROR $\alpha$  and DHR3, utilized the Gal4 DNA binding domain fusion to the transactivation domain of ROR $\alpha$  or DHR3 (*Drosophila* hormone receptor 3). These assays were used to confirm the selectivity of ROR $\gamma$  inhibitors. The itemized protocol used for all four assays is shown below in Table 1. Screen and follow up assay data were deposited in PubChem (AID 2604).

**Table 1.** Itemized protocol for ROR $\gamma$ , VP16 and ROR $\alpha$  reporter assays used in the qHTS and follow up studies.

| Step | Parameter  | Value        | Description                              |
|------|------------|--------------|------------------------------------------|
| 1    | Reagent    | 4 uL         | 600 cells/well                           |
| 2    | Compound   | 23 nL        | 46 uM – 1.7 nM                           |
| 3    | Time       | 1 hr         | Ambient incubation                       |
| 4    | Reagent    | 1 uL         | 0.7 mM copper sulfate                    |
| 5    | Centrifuge | 30 sec       | 1000 RPM                                 |
| 6    | Time       | 20 hr        | Ambient incubation                       |
| 7    | Reagent    | 1.5 uL       | <i>Photinus</i> luciferase detection mix |
| 8    | Time       | 10 min       | Ambient incubation                       |
| 9    | Detector   | Luminescence | ViewLux                                  |

Notes. Cells (600/well) were dispensed into white solid 1536-well plates (Greiner) using a solenoid-based dispenser. Following transfer of 23 nL compound or DMSO vehicle by a pin tool, the plates were incubated 1 h at ambient temperature, and 1  $\mu$ L/well copper sulfate (700  $\mu$ M final concentration) was added. The plates were centrifuged 15 s at 1000 RPM and incubated 20 h at ambient temperature. After addition of 1.5  $\mu$ L *Photinus* luciferase detection reagent, the plates were incubated 10 min at ambient temperature and then read by a ViewLux (Perkin Elmer) to detect luminescence. Raw luminescence reads for each titration point were first normalized relative to the positive control compound (-100%) and DMSO-only wells (0%) as follows: % Activity =  $((V_{\text{compound}} - V_{\text{DMSO}})/(V_{\text{pos}} - V_{\text{DMSO}})) \times 100$ , where  $V_{\text{compound}}$  denotes the compound well values,  $V_{\text{pos}}$  denotes the median value of the positive control wells, and  $V_{\text{DMSO}}$  denotes the median values of the DMSO-only wells. Concentration–response titration points for each compound were then fitted to a four-parameter Hill equation (Hill, A. V., *J Physiol (London)*, **1910**, 40: 4-7) yielding concentrations of half-maximal inhibition ( $IC_{50}$ ) and maximal response (efficacy) values (Wang, Y.; Jadhav, A.; Southall, N.; Huang, R.; Nguyen, D.T., *Curr Chem Genomics*, **2011**, 4: 57-66).

### Nuclear receptors profiling:

Profiling of **4n(-)** in a panel of 20 nuclear receptors for antagonistic activity was done by Invitrogen Inc.

**Table 2.** List of tested nuclear receptors with  $IC_{50}$  values of **4n(-)**.

| Nuclear Receptor | AR         | ER-alpha | ER-beta   | ERR-alpha | FXR       | GR        | LXR-alpha | LXR-beta | MR      | PPAR-delta |
|------------------|------------|----------|-----------|-----------|-----------|-----------|-----------|----------|---------|------------|
| <b>IC50 (nM)</b> | >20000     | >20000   | >20000    | 14100     | >20000    | >20000    | 10500     | >20000   | >20000  | >20000     |
| Nuclear Receptor | PPAR-gamma | PR       | RAR-alpha | RAR-beta  | RAR-gamma | RXR-alpha | RXR-beta  | TR-alpha | TR-beta | VDR        |
| <b>IC50 (nM)</b> | >20000     | >20000   | >20000    | >20000    | >20000    | >20000    | >20000    | 4480     | 12700   | >20000     |

## ROR $\gamma$ Binding assay:

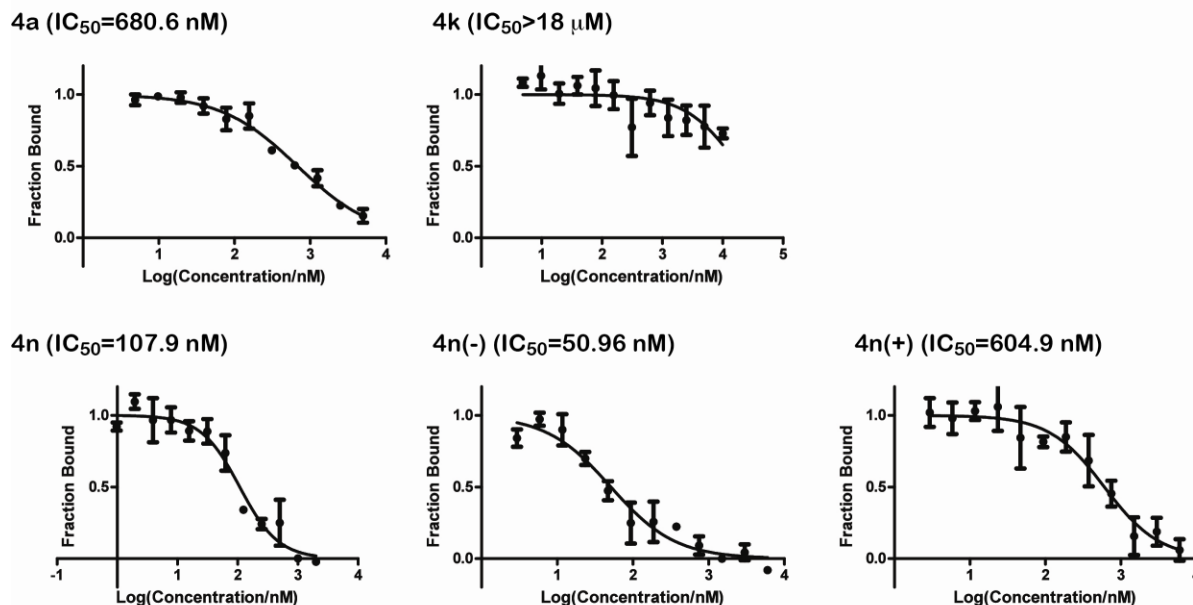

**Figure 1. A series of diphenylpropanamides bound to human ROR $\gamma$ .** Recombinant human ROR $\gamma$  LBD was loaded with fluorescently-labeled 25-hydroxycholesterol in the presence of the indicated concentrations of diphenylpropanamide compounds, and fluorescence polarization was measured.

**In vitro binding and competition assay.** Human ROR $\gamma$  LBD (residues 262–518) with an N-terminal His-tag and a thrombin cleavage site, was expressed in BL21-CodonPlus(DE3)-RIL *E. coli* cells (Stratagene) using a pET46 Ek/Lic vector. The cells were induced with 0.5 mM IPTG at 16 °C for 12 h, then collected and lysed in 20 mM Tris-HCl (pH 8.0), 500 mM NaCl, 20 mM imidazole and 10% glycerol. The supernatant was loaded onto a HisTrap<sup>TM</sup> FF crude 5 mL column on an AKTApurify HPLC system. The protein was eluted with a 20–500 mM imidazole gradient and dialyzed overnight against 20 mM Tris-HCl (pH 8.0), 200 mM NaCl and 5 mM DTT. The protein was further purified using a Q Sepharose<sup>TM</sup> Fast Flow anion exchange column (Amersham Biosciences). The flow-through fractions containing the ROR $\gamma$  LBD were pooled and concentrated. Subsequent size exclusion chromatography was performed on a HiLoad<sup>TM</sup> 16/60 Superdex<sup>TM</sup> 200 prep grade column. The final protein sample was in 20 mM Tris-HCl (pH 8.0), 200 mM NaCl and 10 mM DTT.

For fluorescence polarization competition assays, 104 nM ROR $\gamma$  LBD protein and 5 nM Fluorescein-labeled 25-hydroxycholesterol were incubated with various concentrations of testing compounds at 4 °C for 6 h. The fluorescence polarization signals were recorded using 96-well black polystyrene plates on a FlexStation 3. All the experiments were performed in triplicate and the data were later converted to fluorescence anisotropy values and normalized. The  $IC_{50}$  of each tested compound was calculated by fitting the curve in GraphPad Prism 5.

**In vitro mouse T cell culture.** T cells were purified from the lymph nodes and spleens of six to eight week old C57BL/6 mice (Taconic) by magnetically depleting B220<sup>+</sup> cells (autoMACS, Miltenyi), and then sorted CD8<sup>+</sup> DAPI<sup>+</sup> CD19<sup>+</sup> CD4<sup>+</sup> CD25<sup>+</sup> CD62L<sup>+</sup> CD44<sup>low/Int</sup> naïve T cells on a FACSaria (BD). Cells were cultivated at 37 °C and 5% CO<sub>2</sub> in T cell media: RPMI 1640 (Invitrogen) supplemented with 10% (vol/vol) heat-inactivated FBS (Hyclone), 50 U penicillin-streptomycin (Invitrogen), 2 mM glutamine, and 50  $\mu$ M  $\beta$ -mercaptoethanol. For T cell polarization, 200  $\mu$ L cells were seeded at  $0.4 \times 10^5$  cells per  $\mu$ L in 96-well plates pre-coated with anti-CD3e (2.5  $\mu$ g/mL) and anti-CD28 (10  $\mu$ g/mL). Cells were cultured for 4–5 days in Th17 polarizing conditions (TGF- $\beta$  (0.3 ng/mL), IL-6 (20

ng/mL), and anti-IFN- $\gamma$  and anti-IL-4 (2 ng/mL)), Th1 conditions (IL-12 (2 ng/mL), IL-2 (10 U/mL) and anti-IL-4 (2 ng/mL)), or Treg conditions (TGF- $\beta$  (5 ng/mL)). For cytokine analysis, cells were incubated for 5 h with phorbol 12-myristate 13-acetate (50 ng/mL; Sigma), ionomycin (500 ng/mL; Sigma) and GolgiStop (BD). Intracellular cytokine staining was performed according to the manufacturer's protocol (Cytofix/Cytoperm buffer set from BD or the FoxP3 staining buffer set from eBioscience) with alexa647-conjugated anti-IL-17a (eBioscience), PE-conjugated anti-IFN- $\gamma$ , and PE-conjugated anti-FoxP3 (eBioscience). An LSR II (BD Biosciences) and FlowJo software (Tree Star) were used for flow cytometry and analysis. Dead cells were excluded using the Live/Dead fixable aqua dead cell stain kit (Invitrogen).

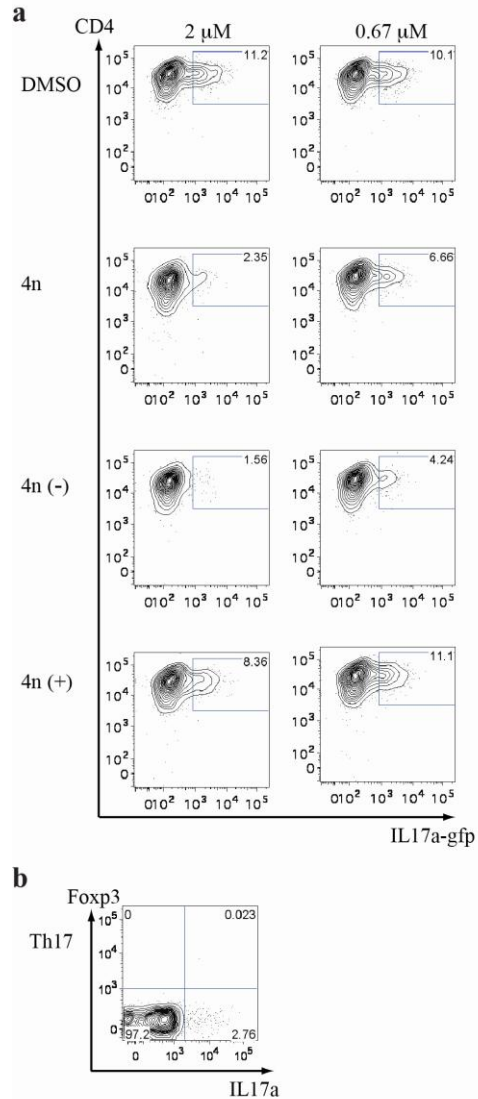

**Figure 2. A series of diphenylpropanamides inhibit mouse Th17 cell differentiation. (a)** Inhibition of mouse Th17 cell differentiation with **4n**, **4n(-)**, and **4n(+)**. Flow cytometry of surface staining for CD4 and GFP signal for IL-17a expression in sorted naïve T cell populations, isolated from a *il17a-ires-egfp* knock-in mouse line (Biocytogen). Cells were activated and expanded in Th17 polarizing culture conditions. DMSO or compounds (2 and 0.67  $\mu$ M) were added on day 1 and analysis was done on day 5. **(b)** Flow cytometry of intracellular staining for IL-17a and FoxP3 in sorted naïve T cell populations activated and expanded in Th17 polarizing culture conditions.

**In vitro human T cell culture.** Blood samples were obtained from the New York Blood Center. Mononuclear cells were prepared from buffy coats from healthy adult donors or from cord blood, using FicollPAQUE gradients. CD4<sup>+</sup> T cells were magnetically selected (autoMACS, Miltenyi). Adult memory CD4<sup>+</sup> T cell subsets were further purified as CD3<sup>+</sup>CD4<sup>+</sup>CD25<sup>-</sup>CD45RO<sup>+</sup>CCR6<sup>+</sup>CD161<sup>+</sup> by cell sorting on a FACS Aria (BD). Naïve CD4<sup>+</sup> T cells were isolated from cord blood as CD3<sup>+</sup>CD4<sup>+</sup>CD45RA<sup>+</sup>HLA-DR CD25<sup>-</sup>DAPI<sup>-</sup>. Memory cells were activated with anti-CD3/CD28 coated beads (1 bead/cell) in T cell media (see above) supplemented with 100 U/mL IL-2 (Peprotech), 10 ng/mL IL-1b and 10 ng/mL IL-23 (eBioscience). Naïve cells were activated with anti-CD3/CD28 beads and cultured with the same cytokines, and TGF- $\beta$  (0, 0.1, 1, or, 10 ng/mL) (Peprotech), in XVIVO-20 (Lonza) media. For ectopic expression experiments, naive CD4<sup>+</sup> T cells, cultured in XVIVO-20 media supplemented with 100 U/mL IL-2 (Peprotech), were transduced with ROR $\alpha$ -IRES-GFP or ROR $\gamma$ t-IRES-GFP on day 1 and analyzed on day 6. GFP-expressing cells were gated for analysis. DMSO or compounds were added 6–8 h after the viral transduction. For flow cytometry and cell culture, the following human specific antibodies were used: CCR6-biotin (11A9 BD), CD3-Alexa750Cy7 (UCHT1 eBioscience), CD4-PacBlue (OKT4 eBioscience), CD25-APC (555434 BD), CD45RA-PE (HI100 eBioscience), CD45RO-APC (UCHL1 eBioscience), IL-17a-APC (eBio64CAP17 eBioscience), IFN- $\gamma$ -PECy7 (45.B3 eBioscience), HLA-DR-FITC (555558 BD), CD3 purified (UCHT1 eBioscience), and CD28 purified (CD28.2 eBioscience).

## Chemistry

**General materials and methods:** All commercially available reagents and solvents were purchased and used without further purification. <sup>1</sup>H spectra were recorded using an Inova 400 MHz spectrometer (Varian). For compounds **4**, several peaks within the proton NMR spectrum existed as rotomers. Samples were analyzed for purity on an Agilent 1200 series LC/MS equipped with a Zorbax™ Eclipse XDB-C18 reverse phase (5 micron, 4.6 x 150 mm) column having a flow rate of 1.1 mL/min. The mobile phase was a mixture of acetonitrile and H<sub>2</sub>O each containing 0.05% trifluoroacetic acid. A gradient of 5% to 100% acetonitrile over 8 minutes was used during analytical analysis. High-resolution mass spectroscopy measurements were performed on an Agilent 6210 Electrospray TOF mass spectrometer.

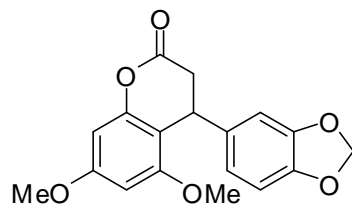

**4-(Benzo[d][1,3]dioxol-5-yl)-5,7-dimethoxychroman-2-one (7a):** A mixture of 3,5-dimethylphenol (1.54 g, 10.0 mmol) and (E)-3-(benzo[d][1,3]dioxol-5-yl)acrylic acid (1.92 g, 10.0 mmol) in TFA (30 mL) was heated at 70 °C for 4 h. The reaction mixture was concentrated under reduced pressure and purified via column chromatography on SiO<sub>2</sub> (ethyl acetate/hexane 7% - 60%) to afford **7a** (2.13 g, 65%) as a white powder. <sup>1</sup>H NMR (CDCl<sub>3</sub>)  $\delta$  6.69 (d,  $J$  = 7.8 Hz, 1 H), 6.60 (d,  $J$  = 1.6 Hz, 1 H), 6.56 (dd,  $J$  = 7.8, 2.0 Hz, 1 H), 6.32 (d,  $J$  = 2.0 Hz, 1 H), 6.28 (d,  $J$  = 2.3 Hz, 1 H), 5.91 (s, 2 H), 4.48 (t,  $J$  = 4.5 Hz, 1 H), 3.82 (s, 3 H), 3.77 (s, 3 H), 2.97 (d,  $J$  = 4.3 Hz, 2 H); LC/MS: (electrospray +ve),  $m/z$  329.1 (MH)<sup>+</sup>,  $t_R$  = 5.83 min, UV<sub>254</sub> = 100%.

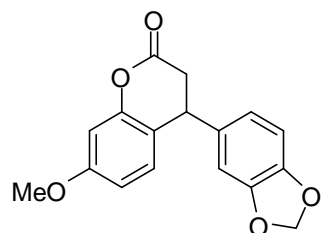

**7b**

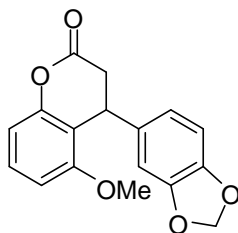

**7c**

**4-(Benzo[d][1,3]dioxol-5-yl)-7-methoxychroman-2-one (7b) and 4-(benzo[d][1,3]dioxol-5-yl)-5-methoxychroman-2-one (7c):** A mixture of 3-methoxyphenol (248 mg, 2.00 mmol) and (E)-3-(benzo[d][1,3]dioxol-5-yl)acrylic acid (384 mg, 2.00 mmol) in TFA (15 mL) was heated at 60 °C for 3 h. The reaction mixture was concentrated under reduced pressure, dissolved in DCM (20 mL), and washed with a saturated NaHCO<sub>3</sub> (20 mL) aqueous solution. The organic layer was dried over MgSO<sub>4</sub>, filtered, and concentrated under reduced pressure. Preparative TLC purification on SiO<sub>2</sub> (ethyl acetate/DCM 5%) afforded **7c** (11 mg, 2%) and **7b** (78 mg, 13%). **7b**: <sup>1</sup>H NMR (CDCl<sub>3</sub>) δ 6.91 (d, *J* = 8.6 Hz, 1 H); 6.77 (d, *J* = 8.6 Hz, 1 H), 6.55 - 6.71 (m, 4 H), 5.96 (s, 2 H), 4.22 (dd, *J* = 7.0, 6.6 Hz, 1 H), 3.81 (s, 3 H), 3.04 (dd, *J* = 15.6, 5.9 Hz, 1 H), 2.93 (dd, *J* = 15.6, 7.8 Hz, 1 H); LC/MS: (electrospray +ve), *m/z* 316.1 (MH)<sup>+</sup>, *t<sub>R</sub>* = 5.56 min, UV<sub>254</sub> > 95%. **7c**: <sup>1</sup>H NMR (CDCl<sub>3</sub>) δ 7.28 (t, *J* = 8.2 Hz, 1 H), 6.78 (d, *J* = 8.2 Hz, 1 H), 6.68 (d, *J* = 8.6 Hz, 1 H), 6.67 (d, *J* = 7.8 Hz, 1 H), 6.60 (d, *J* = 1.6 Hz, 1 H), 6.56 (dd, *J* = 8.2, 1.6 Hz, 1 H), 5.90 (s, 2 H), 4.57 (dd, *J* = 4.7, 3.9 Hz, 1 H), 3.80 (s, 3 H), 3.02 - 2.93 (m, 2 H); LC/MS: (electrospray +ve), *m/z* 316.1 (MH)<sup>+</sup>, *t<sub>R</sub>* = 5.54 min, UV<sub>254</sub> = 100%.

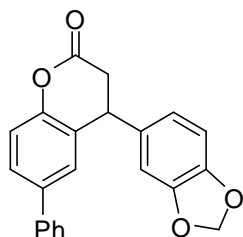

**4-(Benzo[d][1,3]dioxol-5-yl)-6-phenylchroman-2-one (7d):** A mixture of 4-phenylphenol (0.170 g, 1.00 mmol) and (E)-3-(benzo[d][1,3]dioxol-5-yl)acrylic acid (0.192 g, 1.00 mmol) in TFA (10 mL) was heated at 80 °C for 4 h. The reaction mixture was concentrated under reduced pressure and purified via column chromatography on SiO<sub>2</sub> (ethyl acetate/hexane 7% - 60%) to afford **7d** (0.154 g, 45%) as a white powder. <sup>1</sup>H NMR (CDCl<sub>3</sub>) δ 7.45 - 7.58 (m, 3 H), 7.41 (t, *J* = 7.4 Hz, 2 H), 7.30 - 7.37 (m, 1 H), 7.24 (d, *J* = 1.6 Hz, 1 H), 7.21 (d, *J* = 8.6 Hz, 1 H), 6.79 (d, *J* = 8.6 Hz, 1 H), 6.62 - 6.70 (m, 2 H), 5.96 (s, 2 H), 4.34 (dd, *J* = 7.0, 6.5 Hz, 1 H), 3.09 (dd, *J* = 16.0, 5.9 Hz, 1 H) 3.01 (dd, *J* = 16.0, 7.4 Hz, 1 H); LC/MS: (electrospray +ve), *m/z* 345.1 (MH)<sup>+</sup>, *t<sub>R</sub>* = 6.56 min, UV<sub>254</sub> = 100%.

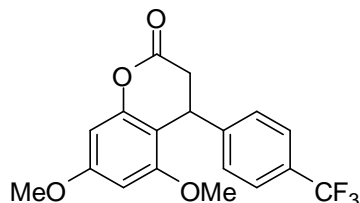

**5,7-Dimethoxy-4-(4-(trifluoromethyl)phenyl)chroman-2-one (7e):** A suspension of 5,7-dimethoxy-2H-chromen-2-one (103 mg, 0.500 mmol), 4-(trifluoromethyl)phenylboronic acid (475 mg, 2.50 mmol), 2,2'-bipyridine (62 mg, 0.40 mmol), and Pd(OAc)<sub>2</sub> (22 mg, 0.10 mmol) in dimethylacetamide (2.0 mL) and acetic acid (0.5 mL) was heated at 110 °C for 24 h. The reaction mixture was concentrated under reduced pressure and purified via column

chromatography on SiO<sub>2</sub> (ethyl acetate/DCM 0% - 20%) to afford **7e** (64 mg, 36% yield). <sup>1</sup>H NMR (CDCl<sub>3</sub>) δ 7.53 (d, *J* = 8.2 Hz, 2 H), 7.24 (d, *J* = 8.2 Hz, 2 H), 6.35 (d, *J* = 2.3 Hz, 1 H), 6.29 (d, *J* = 2.0 Hz, 1 H), 4.61 (dd, *J* = 6.7, 2.0 Hz, 1 H), 3.83 (s, 3 H), 3.76 (s, 3 H), 3.04 (d, *J* = 6.7 Hz, 1 H), 3.02 (d, *J* = 2.3 Hz, 1 H); LC/MS: (electrospray +ve), *m/z* 353.1 (MH)<sup>+</sup>, *t<sub>R</sub>* = 6.50 min, UV<sub>254</sub> = 100%.

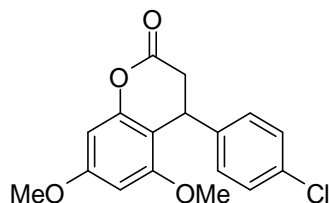

**4-(4-Chlorophenyl)-5,7-dimethoxychroman-2-one (7f):** A suspension of 5,7-dimethoxy-2H-chromen-2-one (103 mg, 0.50 mmol), 4-chlorophenylboronic acid (391 mg, 2.51 mmol), 2,2'-bipyridine (62 mg, 0.40 mmol), and Pd(OAc)<sub>2</sub> (22 mg, 0.10 mmol) in dimethylacetamide (2.0 mL) and acetic acid (0.5 mL) was heated at 110 °C for 24 h. The reaction mixture was concentrated under reduced pressure and purified via column chromatography on SiO<sub>2</sub> (ethyl acetate/DCM 0% - 20%) to afford **7f** (70 mg, 44% yield). <sup>1</sup>H NMR (CDCl<sub>3</sub>) δ 7.24 (d, *J* = 8.6 Hz, 2 H), 7.05 (d, *J* = 8.6 Hz, 2 H), 6.33 (d, *J* = 2.3 Hz, 1 H), 6.28 (d, *J* = 2.3 Hz, 1 H), 4.53 (dd, *J* = 6.3, 2.7 Hz, 1 H), 3.82 (s, 3 H), 3.76 (s, 3 H), 3.00 (d, *J* = 6.7 Hz, 1 H), 2.98 (d, *J* = 3.0 Hz, 1 H); LC/MS: (electrospray +ve), *m/z* 319.0 (MH)<sup>+</sup>, *t<sub>R</sub>* = 6.39 min, UV<sub>254</sub> > 95%.

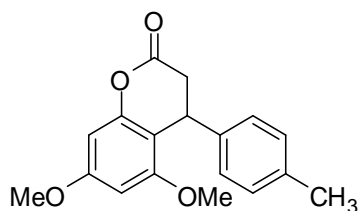

**5,7-Dimethoxy-4-p-tolylchroman-2-one (7g):** A mixture of 3,5-dimethoxyphenol (0.154 g, 1.00 mmol) and (E)-3-p-tolyacrylic acid (0.162 g, 1.00 mmol) in TFA (10 mL) was heated at 70 °C for 12 h. The reaction mixture was concentrated under reduced pressure and purified via column chromatography on SiO<sub>2</sub> (ethyl acetate/hexane 7% - 60%) to afford **7g** (0.162 g, 55%) as a white powder. <sup>1</sup>H NMR (CDCl<sub>3</sub>) δ 7.07 (d, *J* = 7.8 Hz, 2 H), 7.00 (d, *J* = 8.2 Hz, 2 H), 6.33 (d, *J* = 2.0 Hz, 1 H), 6.28 (d, *J* = 2.3 Hz, 1 H), 4.53 (t, *J* = 4.3 Hz, 1 H), 3.82 (s, 3 H), 3.75 (s, 3 H), 2.99 (d, *J* = 4.7 Hz, 2 H), 2.29 (s, 3 H); LC/MS: (electrospray +ve), *m/z* 299.1 (MH)<sup>+</sup>, *t<sub>R</sub>* = 6.27 min, UV<sub>254</sub> = 100%.

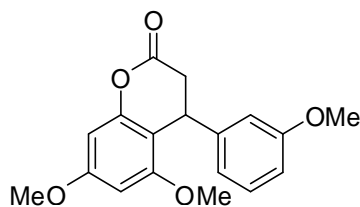

**5,7-Dimethoxy-4-(3-methoxyphenyl)chroman-2-one (7h):** A suspension of 5,7-dimethoxy-2H-chromen-2-one (103 mg, 0.50 mmol), 3-methoxyphenylboronic acid (380 mg, 2.5 mmol), 2,2'-bipyridine (62 mg, 0.40 mmol), and Pd(OAc)<sub>2</sub> (22 mg, 0.10 mmol) in dimethylacetamide (2.0 mL) and acetic acid (0.5 mL) was heated at 110 °C for 24

h. The reaction was concentrated under reduced pressure and the crude product was purified via column chromatography on SiO<sub>2</sub> (ethyl acetate/DCM 0% - 20%) to afford **7h** (58 mg, 37% yield). <sup>1</sup>H NMR (CDCl<sub>3</sub>) δ 7.19 (t, *J* = 7.8 Hz, 1 H), 6.75 (dd, *J* = 8.2, 2.3 Hz, 1 H), 6.71 (d, *J* = 7.4 Hz, 1 H), 6.64 - 6.67 (m, 1 H), 6.33 (d, *J* = 2.3 Hz, 1 H), 6.28 (d, *J* = 2.3 Hz, 1 H), 4.53 (dd, *J* = 5.5, 3.5 Hz, 1 H), 3.82 (s, 3 H), 3.76 (s, 3 H), 3.75 (s, 3 H), 2.97 - 3.03 (m, 2 H); LC/MS: (electrospray +ve), *m/z* 315.1 (MH)<sup>+</sup>, *t<sub>R</sub>* = 5.93 min, UV<sub>254</sub> = 100%.

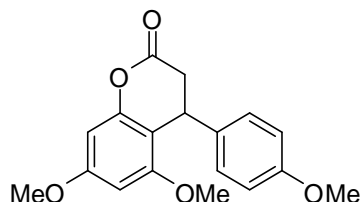

**5,7-Dimethoxy-4-(4-methoxyphenyl)chroman-2-one (7i):** A mixture of 3,5-dimethoxyphenol (0.154 g, 1.00 mmol) and (E)-3-(4-methoxyphenyl)acrylic acid (0.178 g, 1.00 mmol) in TFA (10 mL) was heated at 60 °C for 4 h. The reaction mixture was concentrated under reduced pressure and purified via column chromatography on SiO<sub>2</sub> (ethyl acetate/hexane 7% - 60%) to afford **7i** (0.198 g, 63% yield). <sup>1</sup>H NMR (CDCl<sub>3</sub>) δ 7.03 (d, *J* = 8.6 Hz, 2 H), 6.80 (d, *J* = 8.6 Hz, 2 H), 6.33 (d, *J* = 2.3 Hz, 1 H), 6.28 (d, *J* = 2.3 Hz, 1 H), 4.52 (t, *J* = 4.3 Hz, 1 H), 3.82 (s, 3 H), 3.76 (s, 6 H), 2.98 (d, *J* = 4.3 Hz, 2 H); LC/MS: (electrospray +ve), *m/z* 315.1 (MH)<sup>+</sup>, *t<sub>R</sub>* = 5.93 min, UV<sub>254</sub> = 100%.

General procedures for the synthesis of **4**:

#### Method A

A solution of **7** (0.157 mmol, 1.0 equiv) in DMA (3.0 mL) was treated with amine NHR<sup>3</sup>R<sup>4</sup> (2-10 equiv; for ammonium salts, 10 equiv of Hünig's base was also added). The mixture was heated at 80 °C for 8 h, concentrated under reduced pressure and dissolved in DCM (20 mL). The solution was washed with saturated NaHCO<sub>3</sub> (2x10 mL). The organic layer was dried (MgSO<sub>4</sub>), filtered, concentrated under reduced pressure and purified either by HPLC or *via* column chromatography on SiO<sub>2</sub> (0 - 30% ethyl acetate/DCM) to afford the desired product.

#### Method B

A solution of NHR<sup>3</sup>R<sup>4</sup> (0.30 mmol, 2.0 equiv) in toluene (1.0 mL) was treated with Me<sub>3</sub>Al (0.15 mL, 2.0 M in hexanes). The reaction mixture was stirred at r.t. for 30 min, treated with a solution of **7** (0.1 mmol) in toluene (1 mL) and heated at 80 °C for 6 h. The reaction mixture was cooled to r.t., quenched with ice water (20 mL) and extracted with DCM (2x15 mL). The combined organic layers were dried (MgSO<sub>4</sub>), filtered, concentrated under reduced pressure and purified by column chromatography on SiO<sub>2</sub> (0 - 30% ethyl acetate/DCM) to afford the desired product.



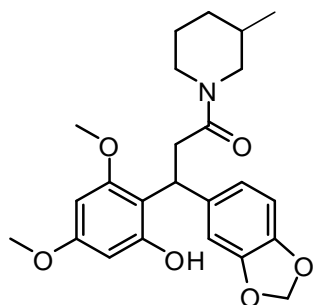

**3-(Benzo[d][1,3]dioxol-5-yl)-3-(2-hydroxy-4,6-dimethoxyphenyl)-1-(3-methylpiperidin-1-yl)propan-1-one**

**(4a):** **4a** was prepared by method A as a mixture of diastereomers.  $^1\text{H}$  NMR ( $\text{DMSO}-d_6$ )  $\delta$  9.37 (br. s., 2 H), 6.74 - 6.85 (m, 2 H), 6.68 (s, 4 H), 6.00 (s, 4 H), 5.87 (s, 4 H), 4.78 - 4.94 (m, 2 H), 3.98 - 4.28 (m, 2 H), 3.56 - 3.82 (m, 14 H), 2.79 - 3.29 (m, 5 H), 2.50 - 2.64 (m, 1 H), 2.41 (d,  $J$  = 11.7 Hz, 1 H), 2.06 - 2.29 (m, 1 H), 1.59 - 1.77 (m, 2 H), 1.44 - 1.59 (m, 2 H), 0.94 - 1.40 (m, 6 H), 0.78 (t,  $J$  = 5.9 Hz, 6 H); HPLC:  $t_R$  = 6.00 min,  $\text{UV}_{254}$  = 100%; HRMS (ESI):  $m/z$  calcd for  $\text{C}_{24}\text{H}_{29}\text{NO}_6$   $[\text{M}+\text{H}]^+$  428.2071, found 428.2074.

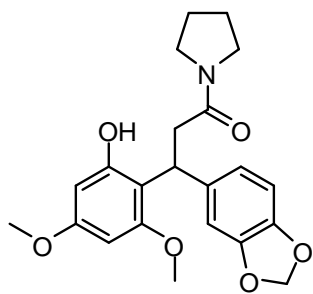

**3-(Benzo[d][1,3]dioxol-5-yl)-3-(2-hydroxy-4,6-dimethoxyphenyl)-1-(pyrrolidin-1-yl)propan-1-one (4b):**

Prepared by method A.  $^1\text{H}$  NMR ( $\text{DMSO}-d_6$ )  $\delta$  9.37 (s, 1 H), 6.79 (s, 1 H), 6.70 (br.s., 2 H), 6.01 (s, 2 H), 5.89 (s, 2 H), 4.92 (dd,  $J$  = 8.4, 6.1 Hz, 1 H), 3.66 (s, 3 H), 3.63 (s, 3 H), 3.30-3.41 (m, 2 H), 3.15 - 3.27 (m, 3 H), 2.83 (dd,  $J$  = 15.9, 5.7 Hz, 1 H), 1.76 - 1.87 (m, 2 H), 1.66 - 1.76 (m, 2 H); HPLC:  $t_R$  = 5.24 min,  $\text{UV}_{254}$  > 95%; HRMS (ESI):  $m/z$  calcd for  $\text{C}_{22}\text{H}_{25}\text{NO}_6$   $[\text{M}+\text{H}]^+$  400.1749, found 400.1755.

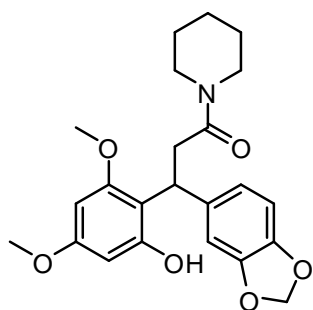

**3-(Benzo[d][1,3]dioxol-5-yl)-3-(2-hydroxy-4,6-dimethoxyphenyl)-1-(piperidin-1-yl)propan-1-one (4c):**

Prepared by method A.  $^1\text{H}$  NMR ( $\text{DMSO}-d_6$ )  $\delta$  9.35 (s, 1 H), 6.78 (s, 1 H), 6.68 (br.s., 2 H), 5.99 (s, 2 H), 5.87 (s, 2 H), 4.86 (t,  $J$  = 7.2 Hz, 1 H), 3.66 (s, 3 H), 3.63 (s, 3 H), 3.25-3.40 (m, 3 H), 3.19 (dd,  $J$  = 15.3, 8.2 Hz, 1 H), 2.85 - 3.02 (m, 2 H), 1.45 - 1.61 (m, 2 H), 1.24 - 1.40 (m, 4 H); HPLC:  $t_R$  = 5.71 min,  $\text{UV}_{254}$  > 90%; HRMS (ESI):  $m/z$  calcd for  $\text{C}_{23}\text{H}_{27}\text{NO}_6$   $[\text{M}+\text{H}]^+$  414.1911, found 414.1912.

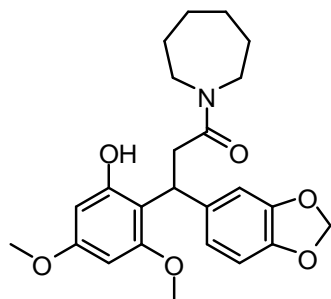

**1-(Azepan-1-yl)-3-(benzo[d][1,3]dioxol-5-yl)-3-(2-hydroxy-4,6-dimethoxyphenyl)propan-1-one (4d):** Prepared by method A.  $^1\text{H}$  NMR ( $\text{DMSO}-d_6$ )  $\delta$  9.36 (s, 1 H), 6.79 (s, 1 H), 6.69 (br.s., 2 H), 6.01 (s, 2 H), 5.89 (s, 2 H), 4.94 (dd,  $J = 8.2, 6.3$  Hz, 1 H), 3.68 (s, 3 H), 3.65 (s, 3 H), 3.16 - 3.57 (m, 5 H), 2.90 (dd,  $J = 15.9, 6.1$  Hz, 1 H), 1.55 - 1.67 (m, 2 H), 1.45 - 1.55 (m, 2 H), 1.41 (d,  $J = 2.4$  Hz, 4 H); HPLC:  $t_R = 5.82$  min,  $\text{UV}_{254} = 100\%$ ; HRMS (ESI):  $m/z$  calcd for  $\text{C}_{24}\text{H}_{29}\text{NO}_6$   $[\text{M}+\text{H}]^+$  428.2071, found 428.2073.

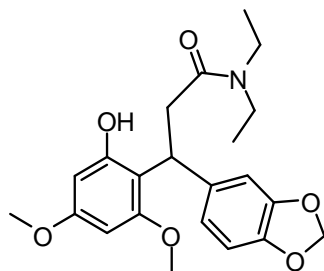

**3-(Benzo[d][1,3]dioxol-5-yl)-N,N-diethyl-3-(2-hydroxy-4,6-dimethoxyphenyl)propanamide (4e):** Prepared by method A.  $^1\text{H}$  NMR ( $\text{DMSO}-d_6$ )  $\delta$  9.36 (s, 1 H), 6.77 (s, 1 H), 6.63 - 6.73 (m, 2 H), 6.01 (s, 2 H), 5.89 (s, 2 H), 4.92 (t,  $J = 7.2$  Hz, 1 H), 3.68 (s, 3 H), 3.66 (s, 3 H), 3.10 - 3.32 (m, 5 H), 2.81 - 2.98 (m, 1 H), 1.06 (t,  $J = 6.9$  Hz, 3 H), 0.91 (t,  $J = 6.9$  Hz, 3 H); HPLC:  $t_R = 5.51$  min,  $\text{UV}_{254} = 100\%$ ; HRMS (ESI):  $m/z$  calcd for  $\text{C}_{22}\text{H}_{27}\text{NO}_6$   $[\text{M}+\text{H}]^+$  402.1911, found 402.1912.

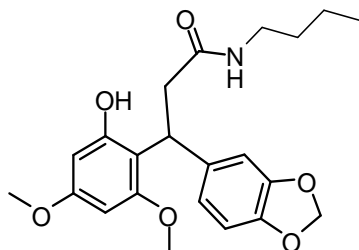

**3-(Benzo[d][1,3]dioxol-5-yl)-N-butyl-3-(2-hydroxy-4,6-dimethoxyphenyl)propanamide (4f):** Prepared by method A.  $^1\text{H}$  NMR ( $\text{DMSO}-d_6$ )  $\delta$  9.34 (s, 1 H), 7.68 (t,  $J = 5.5$  Hz, 1 H), 6.83 (s, 1 H), 6.68 (s, 2 H), 6.00 (s, 2 H), 5.88 (s, 2 H), 4.89 (dd,  $J = 9.8, 5.5$  Hz, 1 H), 3.69 (s, 3 H), 3.65 (s, 3 H), 3.18 (dd,  $J = 14.7, 10.0$  Hz, 1 H), 2.85 - 3.04 (m, 2 H), 2.44-2.50 (m, 1H), 1.19 - 1.30 (m, 2 H), 1.10-1.15 (m, 2 H), 0.79 (t,  $J = 7.4$  Hz, 3 H); HPLC:  $t_R = 5.40$  min,  $\text{UV}_{254} = 100\%$ ; HRMS (ESI):  $m/z$  calcd for  $\text{C}_{22}\text{H}_{27}\text{NO}_6$   $[\text{M}+\text{H}]^+$  402.1911, found 402.1909.

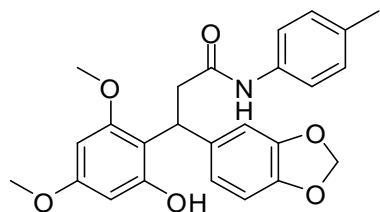

**3-(Benzo[d][1,3]dioxol-5-yl)-3-(2-hydroxy-4,6-dimethoxyphenyl)-N-p-tolylpropanamide (4g):** Prepared by method B.  $^1\text{H}$  NMR ( $\text{DMSO}-d_6$ )  $\delta$  9.72 (s, 1 H), 9.34 (s, 1 H), 7.36 (d,  $J = 8.2$  Hz, 2 H), 6.98 (d,  $J = 8.2$  Hz, 2 H), 6.81 (s, 1 H), 6.60 - 6.71 (m, 2 H), 5.95 (s, 2 H), 5.82 (s, 2 H), 4.94 (dd,  $J = 9.4, 5.5$  Hz, 1 H), 3.65 (s, 3 H), 3.59 (s, 3 H), 3.37 (dd,  $J = 15.3, 9.8$  Hz, 1 H), 2.69 (dd,  $J = 15.3, 5.5$  Hz, 1 H), 2.15 (s, 3 H); HPLC:  $t_R = 5.90$  min,  $\text{UV}_{254} = 100\%$ ; HRMS (ESI):  $m/z$  calcd for  $\text{C}_{25}\text{H}_{25}\text{NO}_6$   $[\text{M}+\text{H}]^+$  436.1755, found 436.1749.

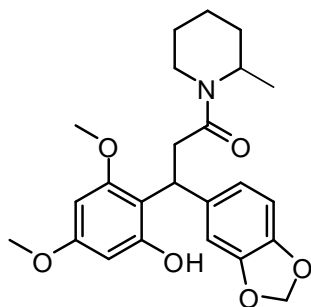

**3-(Benzo[d][1,3]dioxol-5-yl)-3-(2-hydroxy-4,6-dimethoxyphenyl)-1-(2-methylpiperidin-1-yl)propan-1-one (4h):** **4h** was prepared by method B as a mixture of diastereomers.  $^1\text{H}$  NMR ( $\text{DMSO}-d_6$ )  $\delta$  9.37 (s, 2 H), 6.80 (s, 2 H), 6.70 (s, 4 H), 6.01 (s, 4 H), 5.89 (s, 4 H), 4.88 (d,  $J = 5.5$  Hz, 2 H), 4.59 - 4.70 (m, 2 H), 4.11 - 4.28 (m, 2 H), 3.68 (s, 6 H), 3.65 (s, 6 H), 2.84 - 3.26 (m, 6 H), 1.29 - 1.66 (m, 10 H), 0.86 - 1.27 (m, 8 H); HPLC:  $t_R = 5.89$  min,  $\text{UV}_{254} = 100\%$ ; HRMS (ESI):  $m/z$  calcd for  $\text{C}_{24}\text{H}_{29}\text{NO}_6$   $[\text{M}+\text{H}]^+$  428.2071, found 428.2068.

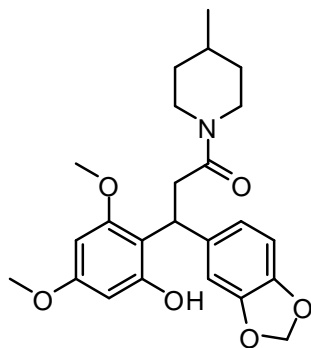

**3-(Benzo[d][1,3]dioxol-5-yl)-3-(2-hydroxy-4,6-dimethoxyphenyl)-1-(4-methylpiperidin-1-yl)propan-1-one (4i):** Prepared by method A.  $^1\text{H}$  NMR ( $\text{DMSO}-d_6$ )  $\delta$  9.37 (br.s., 1 H), 6.79 (dd,  $J = 8.8, 5.3$  Hz, 1 H), 6.63 - 6.74 (m, 2 H), 6.01 (s, 2 H), 5.89 (s, 2 H), 4.82 - 4.92 (m, 1 H), 3.68 (s, 3 H), 3.65 (s, 3 H), 3.10 - 3.29 (m, 2 H), 2.78 - 3.01 (m, 3 H), 2.35 - 2.46 (m, 1 H), 1.53 (d,  $J = 9.4$  Hz, 3 H), 0.75 - 0.93 (m, 5 H); HPLC:  $t_R = 6.01$  min,  $\text{UV}_{254} > 90\%$ ; HRMS (ESI):  $m/z$  calcd for  $\text{C}_{24}\text{H}_{29}\text{NO}_6$   $[\text{M}+\text{H}]^+$  428.2071, found 428.2066.

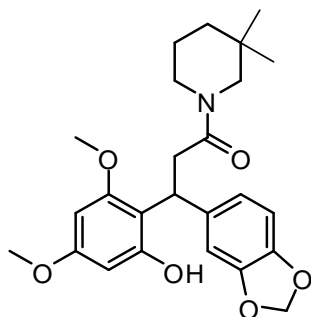

**3-(Benzo[d][1,3]dioxol-5-yl)-1-(3,3-dimethylpiperidin-1-yl)-3-(2-hydroxy-4,6-dimethoxyphenyl)propan-1-one (4j):** Prepared by method A.  $^1\text{H}$  NMR ( $\text{DMSO}-d_6$ )  $\delta$  9.33 - 9.42 (m, 1 H), 6.77 - 6.85 (m, 1 H), 6.67 - 6.73 (m, 2 H), 6.00 (s, 2 H), 5.89 (s, 2 H), 4.82 - 4.97 (m, 1 H), 3.68 (s, 3 H), 3.65 (s, 3 H), 2.88 - 3.48 (m, 6 H), 1.20 - 1.45 (m, 4 H), 0.68 - 0.97 (m, 6 H); HPLC:  $t_R$  = 6.03 min,  $\text{UV}_{254}$  = 98%; HRMS (ESI):  $m/z$  calcd for  $\text{C}_{25}\text{H}_{31}\text{NO}_6$   $[\text{M}+\text{H}]^+$  442.2224, found 442.2224.

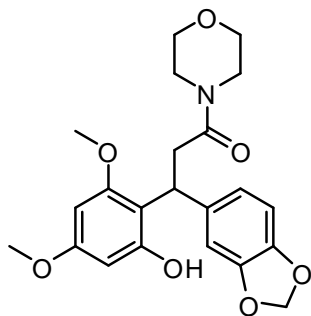

**3-(Benzo[d][1,3]dioxol-5-yl)-3-(2-hydroxy-4,6-dimethoxyphenyl)-1-morpholinopropan-1-one (4k):** Prepared by method A.  $^1\text{H}$  NMR ( $\text{DMSO}-d_6$ )  $\delta$  9.39 (s, 1 H), 6.81 (s, 1 H), 6.66 - 6.74 (m, 2 H), 6.01 (s, 2 H), 5.90 (s, 2 H), 4.88 (t,  $J$  = 7.4 Hz, 1 H), 3.68 (s, 3 H), 3.65 (s, 3 H), 3.34 - 3.53 (m, 6 H), 3.11 - 3.22 (m, 2 H), 3.03 - 3.10 (m, 1 H), 2.99 (dd,  $J$  = 15.3, 6.7 Hz, 1 H); HPLC:  $t_R$  = 4.92 min,  $\text{UV}_{254}$  = 95%; HRMS (ESI):  $m/z$  calcd for  $\text{C}_{22}\text{H}_{25}\text{NO}_7$   $[\text{M}+\text{H}]^+$  416.1715, found 416.1714.

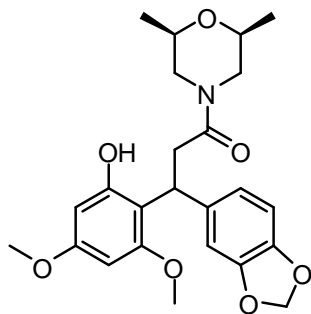

**3-(Benzo[d][1,3]dioxol-5-yl)-1-(cis-2,6-dimethylmorpholino)-3-(2-hydroxy-4,6-dimethoxyphenyl)propan-1-one (4l):** Prepared by method A.  $^1\text{H}$  NMR ( $\text{DMSO}-d_6$ )  $\delta$  9.38 (m, 1 H), 6.74 - 6.86 (m, 1 H), 6.61 - 6.73 (m, 2 H), 5.96 - 6.02 (m, 2 H), 5.88-5.91 (m, 2 H), 4.74 - 4.92 (m, 1 H), 4.15-4.22 (m, 1 H), 3.56 - 3.73 (m, 6 H), 3.11 - 3.27 (m, 3 H), 2.82 - 3.08 (m, 2 H), 2.51 - 2.69 (m, 1 H), 1.97 - 2.18 (m, 1 H), 0.90 - 1.12 (m, 6 H); HPLC:  $t_R$  = 5.27 min,  $\text{UV}_{254}$  = 95%; HRMS (ESI):  $m/z$  calcd for  $\text{C}_{24}\text{H}_{29}\text{NO}_7$   $[\text{M}+\text{H}]^+$  444.2020, found 442.2020.

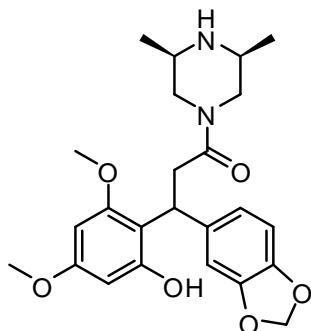

**3-(Benzo[d][1,3]dioxol-5-yl)-1-(*cis*-3,5-dimethylpiperazin-1-yl)-3-(2-hydroxy-4,6-dimethoxyphenyl)propan-1-one (4m):** Prepared by method A.  $^1\text{H}$  NMR ( $\text{DMSO}-d_6$ )  $\delta$  9.36 - 9.51 (m, 1 H), 8.42 (br. s., 1 H), 6.61 - 6.94 (m, 3 H), 6.02 (br. s., 2 H), 5.90-5.92 (m, 2 H), 4.86 (t,  $J = 7.2$  Hz, 1 H), 4.40 - 4.48 (m, 1 H), 3.91 - 4.06 (m, 1 H), 3.69 (s, 3 H), 3.66 (s, 3 H), 2.74 - 3.25 (m, 5 H), 2.28 - 2.47 (m, 1 H), 1.18 (d,  $J = 6.3$  Hz, 6 H); HPLC:  $t_R = 4.04$  min,  $\text{UV}_{254} = 98\%$ ; HRMS (ESI):  $m/z$  calcd for  $\text{C}_{24}\text{H}_{30}\text{N}_2\text{O}_6$   $[\text{M}+\text{H}]^+$  443.2188, found 443.2182.

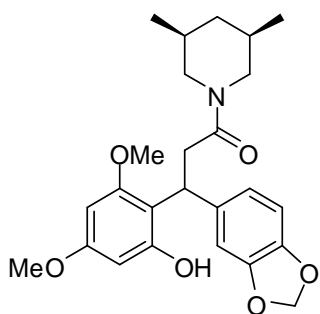

**3-(Benzo[d][1,3]dioxol-5-yl)-1-(*cis*-3,5-dimethylpiperidin-1-yl)-3-(2-hydroxy-4,6-dimethoxyphenyl)propan-1-one (4n):** Prepared by method A.  $^1\text{H}$  NMR ( $\text{DMSO}-d_6$ , 25 °C)  $\delta$  9.39 (s, 1 H), 6.82 (d,  $J = 15.3$  Hz, 1 H), 6.63 - 6.75 (m, 2 H), 6.01 (s, 2 H), 5.90 (s, 2 H), 4.79 - 4.91 (m, 1 H), 4.28 - 4.38 (m, 1 H), 3.71 - 3.90 (m, 1 H), 3.68 (m, 3 H), 3.65 (s, 3 H), 2.87 - 3.29 (m, 2 H), 2.40 (q,  $J = 11.7$  Hz, 1 H), 1.86 (t,  $J = 11.9$  Hz, 1 H), 1.62 - 1.74 (m, 1 H), 1.10 - 1.38 (m, 2 H), 0.79 (d,  $J = 6.3$  Hz, 6 H), 0.56 - 0.75 (m, 1 H); LC/MS: (electrospray +ve),  $m/z$  442.2 (MH) $^+$ ,  $t_R = 6.14$  min,  $\text{UV}_{254} = 98\%$ . Chiral separation of **4n** by HPLC (Column: IA Preparatory 5 cm x 50 cm; Run Time: 40 minutes; Flow Rate: 35 mL/min; Mobile Phase: 60/40 EtOH/Hexane; Detectors: DAD (220 and 254 nm)) gave **4n(-)** and **4n(+)**.

**(-) 3-(Benzo[d][1,3]dioxol-5-yl)-1-*cis*-3,5-dimethylpiperidin-1-yl)-3-(2-hydroxy-4,6-dimethoxyphenyl)propan-1-one (4n(-)):**  $^1\text{H}$  NMR ( $\text{DMSO}-d_6$ , 60 °C)  $\delta$  9.21 (s, 1 H), 6.82 (s, 1 H), 6.67 - 6.73 (m, 2 H), 6.02 - 6.04 (m, 2 H), 5.88 - 5.89 (m, 2 H), 4.88 (t,  $J = 7.2$  Hz, 1 H), 4.28 - 4.38 (m, 1 H), 3.72 - 3.90 (m, 1 H), 3.69 (s, 3 H), 3.67 (s, 3 H), 2.92 - 3.20 (m, 2 H), 2.34 - 2.50 (m, 1 H), 1.80 - 1.94 (m, 1 H), 1.64 - 1.74 (m, 1 H), 1.20 - 1.38 (m, 2 H), 0.81 (d,  $J = 6.3$  Hz, 6 H), 0.65 - 0.74 (m, 1 H); LC/MS:  $t_R = 4.39$  min; Purity:  $\text{UV}_{220} > 95\%$ ,  $\text{UV}_{254} > 95\%$ ; (Column: IA analytical, 0.46 cm x 25 cm; Run time: 15 min; Flow rate: 1 mL/min; Mobile phase; 60/40 EtOH/Hexane; Detectors: DAD (220 and 254 nm) and PDR chiral detector);  $[\alpha]_D^{23} = -129.1$  (c 1.0,  $\text{CHCl}_3$ ); HRMS (ESI):  $m/z$  calcd for  $\text{C}_{25}\text{H}_{31}\text{NO}_6$   $[\text{M}+\text{H}]^+$  442.2224, found 442.2221.

**(+) 3-(Benzo[d][1,3]dioxol-5-yl)-1-*cis*-3,5-dimethylpiperidin-1-yl)-3-(2-hydroxy-4,6-dimethoxyphenyl)propan-1-one (4n(+)):**  $^1\text{H}$  NMR ( $\text{DMSO}-d_6$ , 60 °C)  $\delta$  9.21 (s, 1 H), 6.82 (br. s., 1 H), 6.64 - 6.75 (m, 2 H), 6.02 - 6.04 (m, 2 H), 5.88-5.89 (m, 2 H), 4.88 (t,  $J = 7.2$  Hz, 1 H), 4.24 - 4.38 (m, 1 H), 3.72 - 3.90 (m, 1 H), 3.69 (s, 3 H), 3.67 (s, 3 H), 2.92 - 3.24 (m, 2 H), 2.31 - 2.50 (m, 1 H), 1.82 - 1.93 (m, 1 H), 1.65 - 1.71 (m, 1 H), 1.22 - 1.38 (m, 2 H), 0.81 (d,  $J = 6.5$  Hz, 6 H), 0.65-0.74 (m, 1 H); LC/MS:  $t_R = 4.83$  min; Purity:  $\text{UV}_{220} > 90\%$ ,  $\text{UV}_{254} > 95\%$ ; (Column: IA analytical, 0.46 cm x 25 cm; Run time: 15 min; Flow rate: 1 mL/min; Mobile phase; 60/40 EtOH/Hexane; Detectors:

DAD (220 and 254 nm) and PDR chiral detector);  $[\alpha]_D^{23} = +127.9$  (c 1.0,  $\text{CHCl}_3$ ); HRMS (ESI):  $m/z$  calcd for  $\text{C}_{25}\text{H}_{31}\text{NO}_6[\text{M}+\text{H}]^+$  442.2224, found 442.2220.

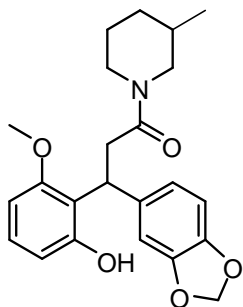

**3-(Benzo[d][1,3]dioxol-5-yl)-3-(2-hydroxy-6-methoxyphenyl)-1-(3-methylpiperidin-1-yl)propan-1-one (4o):** 4o was prepared by method A as a mixture of diastereomers.  $^1\text{H}$  NMR ( $\text{DMSO}-d_6$ )  $\delta$  9.35 (br. s., 2 H), 6.94 (t,  $J = 8.0$  Hz, 2 H), 6.78 - 6.89 (m, 2 H), 6.72 (s, 4 H), 6.41 (dd,  $J = 8.0, 3.7$  Hz, 4 H), 5.90 (s, 4 H), 4.93 - 5.06 (m, 2 H), 3.96 - 4.27 (m, 2 H), 3.70 (s, 6 H), 3.65 - 3.78 (m, 2 H), 2.82 - 3.31 (m, 5 H), 2.54 - 2.63 (m, 1 H), 2.40 - 2.43 (m, 1 H), 2.09 - 2.30 (m, 1 H), 1.46 - 1.76 (m, 4 H), 0.92 - 1.41 (m, 6 H), 0.73 - 0.86 (m, 6 H); HPLC:  $t_R = 5.91$  min,  $\text{UV}_{254} = 100\%$ ; HRMS (ESI):  $m/z$  calcd for  $\text{C}_{23}\text{H}_{27}\text{NO}_5[\text{M}+\text{H}]^+$  398.1965, found 398.1963.

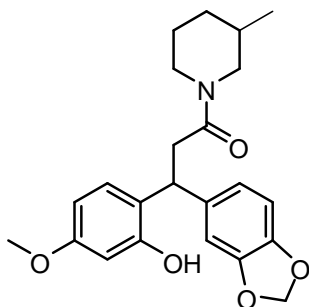

**3-(Benzo[d][1,3]dioxol-5-yl)-3-(2-hydroxy-4-methoxyphenyl)-1-(3-methylpiperidin-1-yl)propan-1-one (4p):** 4p was prepared by method A as a mixture of diastereomers.  $^1\text{H}$  NMR ( $\text{DMSO}-d_6$ )  $\delta$  9.34 - 9.41 (m, 2 H), 7.00 - 7.11 (m, 2 H), 6.64 - 6.86 (m, 6 H), 6.26 - 6.36 (m, 4 H), 5.92 (s, 2 H), 5.91 (s, 2 H), 4.63 (t,  $J = 7.2$  Hz, 2 H), 3.98 - 4.22 (m, 2 H), 3.79 - 3.93 (m, 2 H), 3.64 (s, 6 H), 2.70 - 3.14 (m, 5 H), 2.52 - 2.66 (m, 1 H), 2.37 - 2.48 (m, 1 H), 2.11 - 2.24 (m, 1 H), 1.45 - 1.75 (m, 4 H), 0.94 - 1.46 (m, 6 H), 0.71 - 0.91 (m, 6 H); HPLC:  $t_R = 5.83$  min,  $\text{UV}_{254} = 98\%$ ; HRMS (ESI):  $m/z$  calcd for  $\text{C}_{23}\text{H}_{27}\text{NO}_5[\text{M}+\text{H}]^+$  398.1965, found 398.1960.

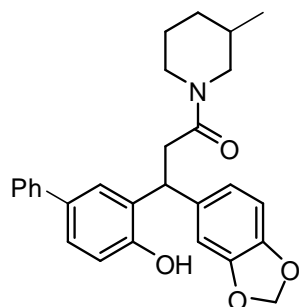

**3-(Benzo[d][1,3]dioxol-5-yl)-3-(4-hydroxybiphenyl-3-yl)-1-(3-methylpiperidin-1-yl)propan-1-one (4q):** **4q** was prepared by method A as a mixture of diastereomers.  $^1\text{H}$  NMR (DMSO- $d_6$ )  $\delta$  9.52 (s, 2 H), 7.45 - 7.62 (m, 6 H), 7.40 (t,  $J$  = 7.24 Hz, 4 H), 7.22 - 7.32 (m, 4 H), 6.95 (br. s., 2 H), 6.72 - 6.86 (m, 6 H), 5.92 (s, 2 H), 5.91 (s, 2 H), 4.74 - 4.87 (m, 2 H), 4.05 - 4.24 (m, 2 H), 3.87 - 4.00 (m, 2 H), 2.81 - 3.27 (m, 5 H), 2.53 - 2.66 (m, 1 H), 2.34 - 2.49 (m, 1 H), 2.13 - 2.27 (m, 1 H), 1.44 - 1.74 (m, 4 H), 0.94 - 1.45 (m, 6 H), 0.82 (dd,  $J$  = 6.3, 3.9 Hz, 3 H), 0.76 (dd,  $J$  = 6.5, 2.9 Hz, 3 H); LC/MS: (electrospray +ve),  $m/z$  444.2 (MH) $^+$ ,  $t_R$  = 6.55 min, UV $_{254}$  = 100%.

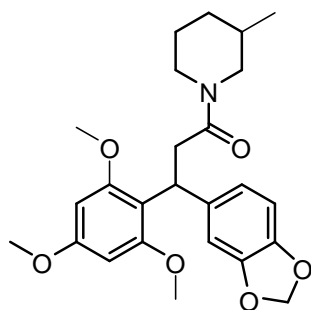

**3-(Benzo[d][1,3]dioxol-5-yl)-1-(3-methylpiperidin-1-yl)-3-(2,4,6-trimethoxyphenyl)propan-1-one (4r):** A solution of **4a** (42 mg, 0.10 mmol) in DMA (2 mL) was treated with iodomethane (43 mg, 0.30 mmol) and Cs $_2$ CO $_3$  (0.328 g, 1.01 mmol). The reaction mixture was heated in a microwave at 150 °C for 10 min, concentrated under reduced pressure, dissolved in DCM (10 mL) and washed with water (10 mL). The organic layer was dried (MgSO $_4$ ), filtered and concentrated under reduced pressure. The crude product was purified via column chromatography on SiO $_2$  (ethyl acetate/DCM 0% - 30%) to afford **4r** (32 mg, 72% yield) as a mixture of diastereomers.  $^1\text{H}$  NMR (DMSO- $d_6$ )  $\delta$  6.62 - 6.81 (m, 6 H), 6.19 (s, 4 H), 5.90 (s, 2 H), 5.89 (s, 2 H), 4.89 - 4.99 (m, 2 H), 4.09 - 4.24 (m, 2 H), 3.60 - 3.80 (m, 20 H), 2.84 - 3.25 (m, 5 H), 2.52 - 2.66 (m, 1 H), 2.37 - 2.48 (m, 1 H), 2.10 - 2.30 (m, 1 H), 1.62 - 1.73 (m, 2 H), 1.47 - 1.62 (m, 2 H), 0.96 - 1.42 (m, 6 H), 0.75 - 0.85 (m, 6 H); LC/MS: (electrospray +ve),  $m/z$  442.2 (MH) $^+$ ,  $t_R$  = 6.34 min, UV $_{254}$  = 100%.

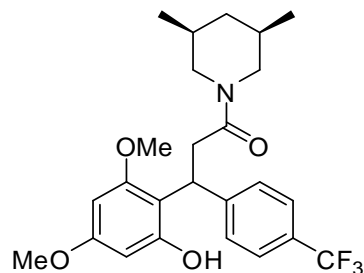

**1-(*cis*-3,5-Dimethylpiperidin-1-yl)-3-(2-hydroxy-4,6-dimethoxyphenyl)-3-(4-(trifluoromethyl)phenyl)propan-1-one (4s):** Prepared by method A.  $^1\text{H}$  NMR ( $\text{DMSO}-d_6$ )  $\delta$  9.48 (br.s, 1 H), 7.54 (d,  $J = 8.2$  Hz, 2 H), 7.37 - 7.45 (m, 2 H), 6.02 (s, 1 H), 6.01 (s, 1 H), 5.03 (t,  $J = 6.8$  Hz, 1 H), 4.31 (d,  $J = 12.1$  Hz, 1 H), 3.77 (d,  $J = 12.9$  Hz, 1 H), 3.61 - 3.71 (m, 6 H), 2.84 - 3.52 (m, 2 H), 2.31 - 2.48 (m, 1 H), 1.89 (t,  $J = 12.1$  Hz, 1 H), 1.68 (t,  $J = 14.5$  Hz, 1 H), 1.10 - 1.46 (m, 2 H), 0.76 - 0.90 (m, 6 H), 0.60 - 0.76 (m, 1 H); LC/MS: (electrospray +ve),  $m/z$  466.2 ( $\text{MH}^+$ ),  $t_R = 6.87$  min,  $\text{UV}_{254} = 98\%$ .

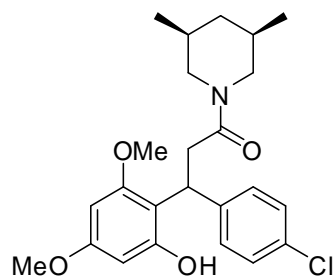

**3-(4-Chlorophenyl)-1-(*cis*-3,5-dimethylpiperidin-1-yl)-3-(2-hydroxy-4,6-dimethoxyphenyl)propan-1-one (4t):** Prepared by method A.  $^1\text{H}$  NMR ( $\text{DMSO}-d_6$ )  $\delta$  9.44 (br. s., 1 H), 7.23 (d,  $J = 3.5$  Hz, 4 H), 6.02 (s, 2 H), 4.94 (t,  $J = 7.2$  Hz, 1 H), 4.32 (d,  $J = 12.5$  Hz, 1 H), 3.70 - 3.86 (m, 1 H), 3.59 - 3.71 (m, 6 H), 2.84 - 3.36 (m, 2 H), 2.38-2.42 (m, 1 H), 1.87 (t,  $J = 12.1$  Hz, 1 H), 1.58 - 1.77 (m, 1 H), 1.10 - 1.47 (m, 2 H), 0.73 - 0.87 (m, 6 H), 0.60-0.74 (m, 1 H); LC/MS: (electrospray +ve),  $m/z$  432.2 ( $\text{MH}^+$ ),  $t_R = 6.75$  min,  $\text{UV}_{254} = 98\%$ .

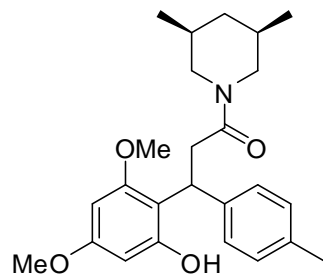

**1-(*cis*-3,5-Dimethylpiperidin-1-yl)-3-(2-hydroxy-4,6-dimethoxyphenyl)-3-p-tolylpropan-1-one (4u):** Prepared by method A.  $^1\text{H}$  NMR ( $\text{DMSO}-d_6$ )  $\delta$  9.34 (s, 1 H), 7.10 (d,  $J = 7.4$  Hz, 2 H), 6.97 (d,  $J = 7.8$  Hz, 2 H), 6.00 (br.s, 2 H), 4.84 - 4.93 (m, 1 H), 4.29 - 4.32 (m, 1 H), 3.70 - 3.80 (m, 1 H), 3.65 (s, 6 H), 2.89 - 3.27 (m, 2 H), 2.30 - 2.46 (m, 1 H), 2.20 (s, 3 H), 1.86 (t,  $J = 12.1$  Hz, 1 H), 1.58 - 1.75 (m, 1 H), 1.08 - 1.39 (m, 2 H), 0.74 - 0.84 (m, 6 H), 0.57 - 0.74 (m, 1 H); LC/MS: (electrospray +ve),  $m/z$  412.2 ( $\text{MH}^+$ ),  $t_R = 6.64$  min,  $\text{UV}_{254} = 98\%$ .

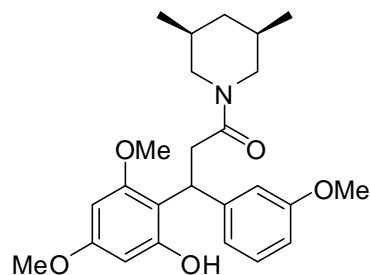



**1-(*cis*-3,5-Dimethylpiperidin-1-yl)-3-(2-hydroxy-4,6-dimethoxyphenyl)-3-(3-methoxyphenyl)propan-1-one (4v):** Prepared by method A.  $^1\text{H}$  NMR ( $\text{DMSO}-d_6$ )  $\delta$  9.37 (s, 1 H), 7.08 (t,  $J = 8.0$  Hz, 1 H), 6.75 - 6.85 (m, 2 H), 6.59 - 6.69 (m, 1 H), 6.01 (s, 2 H), 4.86 - 4.96 (m, 1 H), 4.32 (d,  $J = 12.1$  Hz, 1 H), 3.71 - 3.82 (m, 1 H), 3.65 (s, 6 H), 3.63 (s, 3 H), 2.88 - 3.30 (m, 2 H), 2.33 - 2.46 (m, 1 H), 1.87 (t,  $J = 11.9$  Hz, 1 H), 1.67 (t,  $J = 12.1$  Hz, 1 H), 1.11 - 1.38 (m, 2 H), 0.80 (d,  $J = 6.7$  Hz, 6 H), 0.60 - 0.75 (m, 1 H); LC/MS: (electrospray +ve),  $m/z$  428.2 ( $\text{MH}^+$ ),  $t_R = 6.30$  min,  $\text{UV}_{254} = 95\%$ .

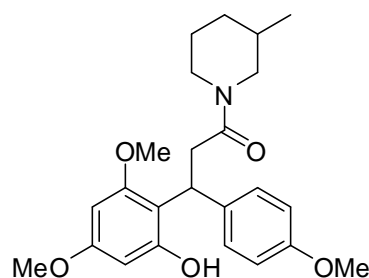

**3-(2-Hydroxy-4,6-dimethoxyphenyl)-3-(4-methoxyphenyl)-1-(3-methylpiperidin-1-yl)propan-1-one (4w):** 4w was prepared by method A as a mixture of diastereomers.  $^1\text{H}$  NMR ( $\text{DMSO}-d_6$ )  $\delta$  9.33 (br. s., 2 H), 7.12 - 7.16 (m, 4 H), 6.73 (d,  $J = 8.6$  Hz, 4 H), 6.00 (s, 4 H), 4.85 - 4.89 (m, 2 H), 3.98 - 4.28 (m, 2 H), 3.77-3.55 (m, 20 H), 2.86 - 3.29 (m, 5 H), 2.50 - 2.64 (m, 1 H), 2.33 - 2.44 (m, 1 H), 2.08 - 2.28 (m, 1 H), 1.62 - 1.70 (m, 2 H), 1.49 - 1.60 (m, 2 H), 0.99 - 1.40 (m, 6 H), 0.79 - 0.84 (m, 6 H); HPLC:  $t_R = 6.64$  min,  $\text{UV}_{254} = 95\%$ ; HRMS (ESI): $m/z$  calcd for  $\text{C}_{24}\text{H}_{31}\text{NO}_5$   $[\text{M}+\text{H}]^+$  414.2278, found 414.2279.

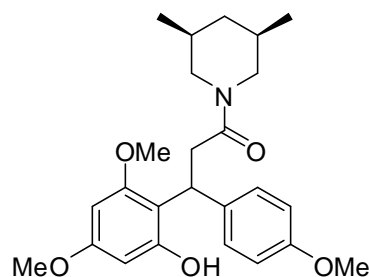

**1-(*cis*-3,5-Dimethylpiperidin-1-yl)-3-(2-hydroxy-4,6-dimethoxyphenyl)-3-(4-methoxyphenyl)propan-1-one (4x):** Prepared by method A.  $^1\text{H}$  NMR ( $\text{DMSO}-d_6$ )  $\delta$  9.35 (s, 1 H), 7.15 (d,  $J = 8.0$  Hz, 2 H), 6.74 (d,  $J = 8.6$  Hz, 2 H), 6.02 (s, 2 H), 4.81 - 4.95 (m, 1 H), 4.32 (d,  $J = 12.1$  Hz, 1 H), 3.71 - 3.81 (m, 1 H), 3.67 (s, 6 H), 3.65 (s, 3 H), 2.92 - 3.29 (m, 2 H), 2.39 (q,  $J = 12.1$  Hz, 1 H), 1.86 (t,  $J = 12.1$  Hz, 1 H), 1.67 (t,  $J = 13.1$  Hz, 1 H), 1.10 - 1.39 (m, 2 H), 0.80 (d,  $J = 5.5$  Hz, 6 H), 0.58 - 0.74 (m, 1 H); HPLC:  $t_R = 6.29$  min,  $\text{UV}_{254} = 95\%$ ; HRMS (ESI): $m/z$  calcd for  $\text{C}_{25}\text{H}_{33}\text{NO}_5$   $[\text{M}+\text{H}]^+$  428.2435, found 428.2428.
